# Supplementary material for: Benzimidazole derivative fluorescent probe for cascade recognition of phosphate and iron ions in aqueous medium and its logic gate behavior
Source: Royal Society of Chemistry journal article supplement (doi:10.1039/c7ra00846e), 2017-01-01
Supplement: c7ra00846e1.pdf [file c7ra00846e1.pdf]

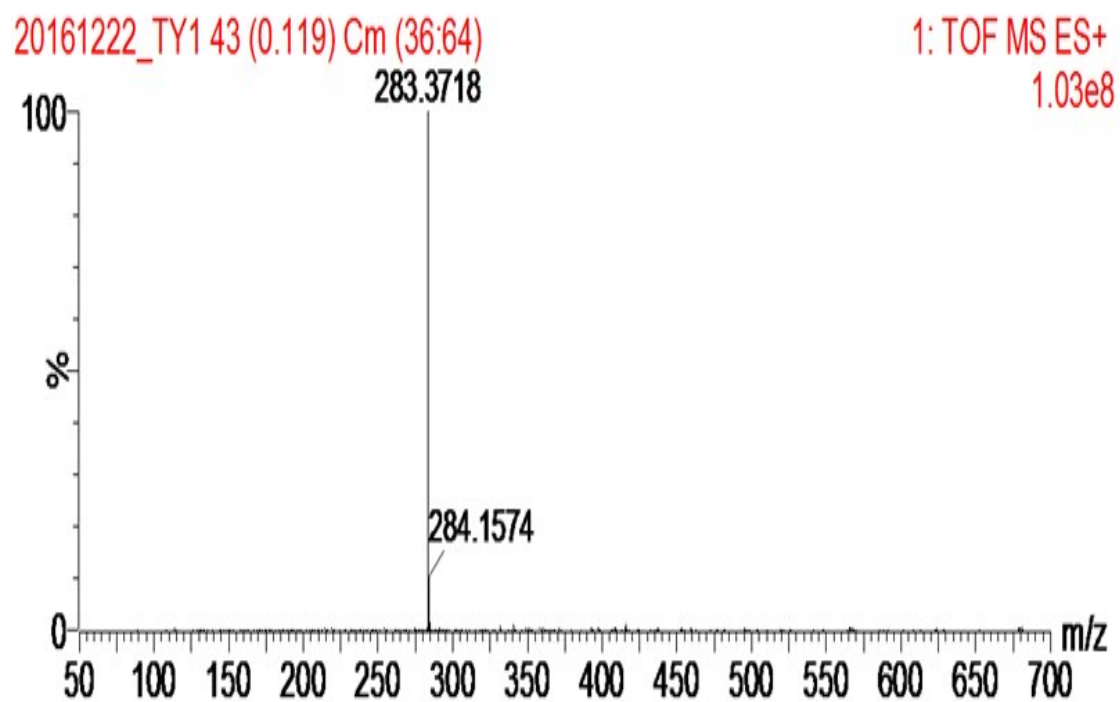

Figure S3. The HRMS spectrum of **1**.

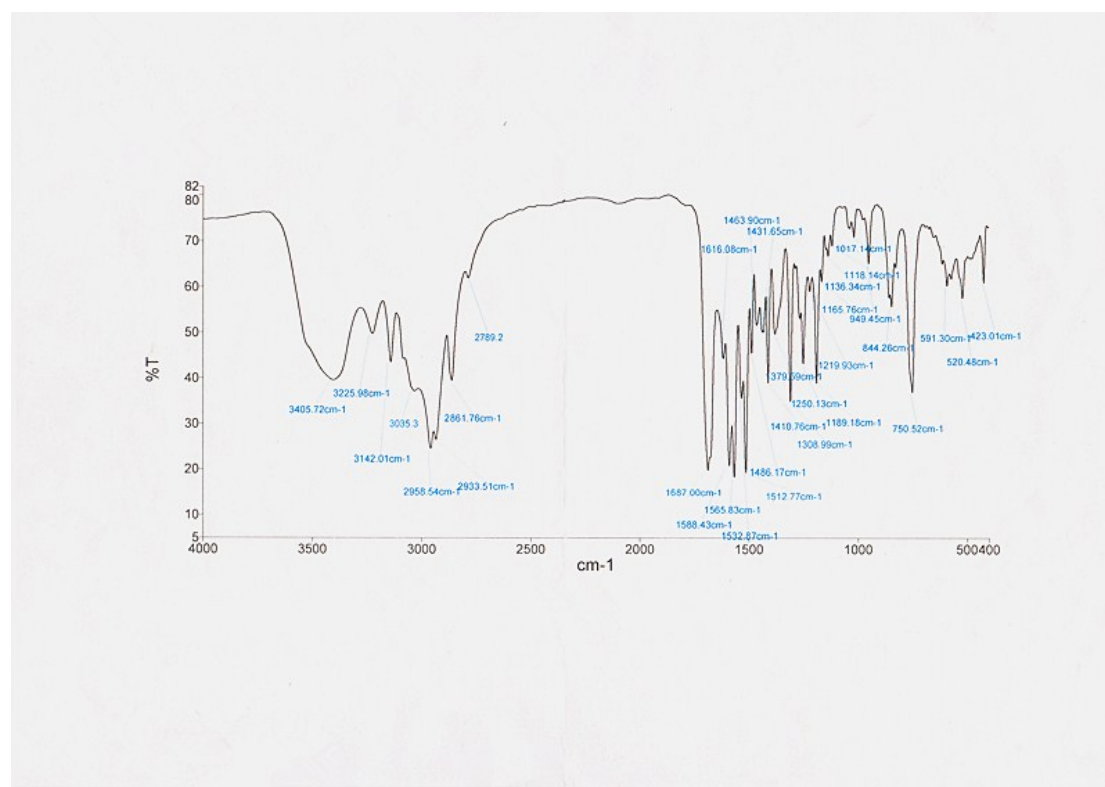

Figure S4. The FTIR spectrum of **1**.

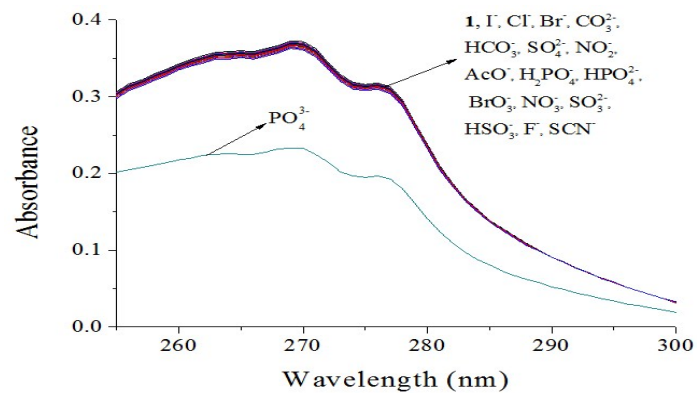

**Figure S5.** UV-vis absorption spectra of probe **1** (10  $\mu\text{M}$ ) upon addition of different anions (1.0 equiv.) in HEPES buffer (10 mM, pH 7.4, 25  $^{\circ}\text{C}$ ) solution.

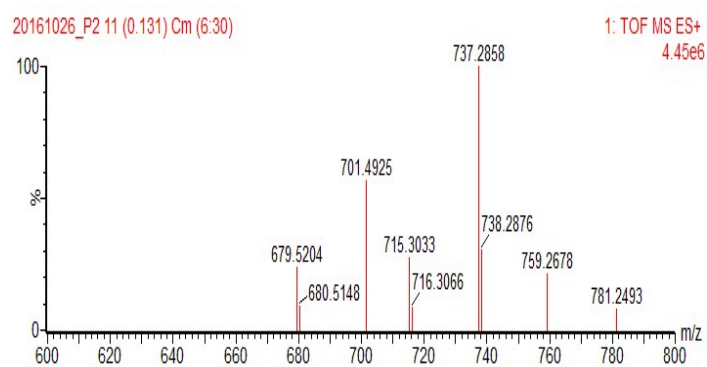

**Figure S6.** The HRMS spectrum of mixture of **1** with  $\text{PO}_4^{3-}$ .
